RESEARCH ARTICLE

# Evaluation of the difference in caries experience in diabetic and non-diabetic children—A case control study

Stefano Lai<sup>1</sup>, Maria Grazia Cagetti<sup>2,3</sup>, Fabio Cocco<sup>2,4</sup>, Dina Cossellu<sup>4</sup>, Gianfranco Meloni<sup>5</sup>, Guglielmo Campus<sup>2,4\*</sup>, Peter Lingström<sup>2,6</sup>

**1** Department of Biomedical Sciences, Medical School, University of Sassari, Sassari, Italy, **2** WHO, Collaborating Centre for Epidemiology and Preventive Dentistry, Milan, Italy, **3** Department of Biomedical, Surgical and Dental Sciences, University of Milan, Milan, Italy, **4** Department of Surgery, Microsurgery and Medical Sciences—Dental School, University of Sassari, Sassari, Italy, **5** Department of Surgery, Microsurgery and Medical Sciences—Clinic of Pediatric, University of Sassari, Sassari, Italy, **6** Department of Cariology, Institute of Odontology, Sahlgrenska Academy, University of Gothenburg, Gothenburg, Sweden

\* [gcampus@uniss.it](mailto:gcampus@uniss.it)

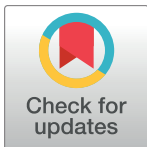

**OPEN ACCESS**

**Citation:** Lai S, Cagetti MG, Cocco F, Cossellu D, Meloni G, Campus G, et al. (2017) Evaluation of the difference in caries experience in diabetic and non-diabetic children—A case control study. PLoS ONE 12(11): e0188451. <https://doi.org/10.1371/journal.pone.0188451>

**Editor:** Susan R. Rittling, Forsyth Institute, UNITED STATES

**Received:** July 19, 2017

**Accepted:** November 7, 2017

**Published:** November 30, 2017

**Copyright:** © 2017 Lai et al. This is an open access article distributed under the terms of the [Creative Commons Attribution License](https://creativecommons.org/licenses/by/4.0/), which permits unrestricted use, distribution, and reproduction in any medium, provided the original author and source are credited.

**Data Availability Statement:** Data access has been restricted because data contain potentially identifying or sensitive information. Data are available from the University of Sassari Ethics Committee for researchers who meet the criteria for access to confidential data (email: [comitatoetico@aslssassari.it](mailto:comitatoetico@aslssassari.it)).

**Funding:** The authors received no specific funding for this work.

**Competing interests:** The authors have declared that no competing interests exist.

## Abstract

### Aim

To evaluate the caries prevalence and related variables in Type 1 diabetic and non-diabetic children and among the diabetic children according to their metabolic status.

### Methods

Sixty-eight diabetic and 136 non-diabetic children, matching by gender and age (4–14 years) were enrolled. The diabetic children were divided: a) 20 children in good metabolic control ( $Hb1ac \leq 7.5$ ) and b) 48 children in bad metabolic control ( $Hb1ac > 7.5$ ). Dietary and oral hygiene habits were investigated. Caries status was registered using the International Caries Detection and Assessment System. Oral microflora was analysed using the checkerboard DNA-DNA hybridisation method. Plaque acidogenicity was recorded after a sucrose rinse.

### Results

Sugared beverage and snack intake was higher in diabetic group compared to non-diabetic group ( $p = 0.03$  and  $p = 0.04$ , respectively) and in subjects in bad metabolic control ( $p = 0.03$  and  $p < 0.01$ , respectively). Oral hygiene habits were similar, except for the use of fluoridated adjuvants, higher in non-diabetic children ( $p = 0.04$ ). No statistically significant differences were observed regarding caries figures, but a higher number of caries free subjects was found in diabetic subjects in good metabolic control ( $p < 0.01$ ). Significant difference for the main cariogenic bacteria was found between diabetic and non-diabetic subjects ( $p < 0.05$ ). The pH values showed statistically significant differences between diabetic and non-diabetic subjects and between diabetic subjects in good and bad metabolic control ( $p < 0.01$ ).

## Conclusions

Diabetic children in good metabolic control might even be considered at low caries risk, while those in bad metabolic control showed an oral environment prone to a high caries risk.

## Introduction

Diabetes mellitus is a chronic disease resulting from a relative or absolute deficiency of insulin, which affects the metabolism of carbohydrate, protein, and fat [1]. Finland, Sardinia (Italy) and Sweden are known to have the highest incidence of Type 1 diabetes in the world [2–6]. Tailored dietary advices are given to children and their families about the amount, type and distribution of carbohydrate to include in main meals and snacks (if appropriate) during the day to promote optimal growth and blood glucose control [7]. Nutrition education and life-style counseling should be adapted and delivered both to the individual child and family.

While the association between oral health and Type 2 diabetes is well recognized [8–10] there is still limited evidence available regarding the association between Type 1 diabetes and oral health, even if various oral problems have been reported including an increased presence of caries [11–13].

Dental caries remains one of the most common chronic disease with a dietary-bacterial aetiology [14]. Caries is characterized by an ecological shift within the dental biofilm environment, driven by frequent access to fermentable dietary carbohydrates, leads to a move from a balanced population of microorganisms of low cariogenicity to a microbiological population of high cariogenicity (more aciduric and acidogenic) and to an increased production of organic acids [15]. The acid production near the tooth structures produces the demineralization of enamel and dentin and subsequently may evolve in the development of a cavitation [16].

Unbalanced diabetes is associated with significant cariogenic changes in the oral environment including less resting and stimulated whole saliva, lower saliva buffering capacity and acidic pH, higher salivary glucose, higher salivary albumin concentrations, high proportion of salivary mutans streptococci and yeast [11, 12, 17–19]. Changes in the oral microflora of diabetic subject in poor glycemic control may significantly influence the prevalence of gingivitis and caries [20, 21]. However, contrary to previous findings, lower caries experience was also reported [22, 23]. No significant differences regarding caries experience between Type 1 diabetic and non-diabetic children was described [24], even if the number of untreated dental caries was higher among the diabetic children, reflecting a lower dental attendance. A high caries susceptibility was also reported in children and adolescents with Type 1 diabetes mellitus in poor bad metabolic control [18, 25, 26]. Poor metabolic control is defined as a HbA1c level exceeding the target range of HbA1c for all age-groups of < 7.5% (58 mmol/mol) [7].

From these premises, there is the need to understand the association between Type 1 diabetes and oral health, especially caries, that has still a high prevalence in children populations; this association might be critical for the diabetes long-term management [27]. The number of people affected by diabetes in Sardinia is estimated in almost 95,000 individuals (56 cases/1000 individuals). In Sassari area 1,013 children affected by Type 1 diabetes are reported (41 cases/1000 individuals) [28]. To reply to this need, caries experience and caries-related variables between diabetic and non-diabetic children were compared; a comparison was also performed among the diabetic children according to their metabolic status. The null-hypothesis was that no difference regarding caries experience between diabetic and non-diabetic children and among diabetic children with differences in the metabolic control would be observed.

## Material and methods

### Study design and sample

The study protocol was approved by the Ethical Committee of the University of Sassari, Sassari, Italy [authorisation number 133/2014] and conducted according to the principles of the Helsinki Declaration II. The study was conducted from January 2015 to September 2015. A cross-sectional case control study (rate 1:2 matched for age and gender) was designed. Two categories of subjects were enrolled, diabetic and non-diabetic children (aged 4–14 years old). The criteria necessary for the enrolment into the study were: diabetes diagnosed from more than 2 years [7], within 14 years of age, living in Sassari and surrounding area, good general health apart from diabetes, reporting to clean teeth at least twice a day.

Power analysis was performed before the start of the study using the web-based Openepi™ platform (<http://openinfo.com>), considering a caries prevalence of about 50% [29]; sample size was increased by 20% bearing in mind a modification in caries prevalence and a high number of non-responders. The number of diabetic children needs to be enrolled was fixed in 64 with an actual power of 0.95. Information about the study program was mailed to 225 parents/guardians of 75 diabetic and 150 non-diabetic children, asking the consent for their child to participate into the study. Seventy-two diabetic children agree to participate and 68 were enrolled, while from the group of 150 non-diabetic children selected, 136 subjects, matching by gender and age were also enrolled. The diabetic children were divided into two subgroups according to data from their medical charts: a) 20 children with a good metabolic control ( $Hb1ac \leq 7.5$ ) and b) 48 children with bad metabolic control ( $Hb1ac > 7.5$ ) [30, 31].

### Questionnaire

A limited checklist of 19 foods and beverages (sugar-sweetened beverages, savoury snacks and sweets) with a frequency response section was parents/self-administered to the subjects to report how often each item was consumed over a specified period [32, 33]. The oral hygiene habits were investigated by questions on regular use and frequency of toothbrushing, use of fluoridated toothpaste, use of others fluoridated products and, frequency of dental attendance [34].

### Clinical examination

The clinical examination was made under optimal lighting using a mirror and a World-Health-Organization probe. The WHO probe has a coloured band (called the reference marking) located 3.5–5.5 mm from the probe tip. For caries registration, the International Caries Detection and Assessment System (ICDAS) [35] index was used. No radiographs for caries diagnosis were used [36]. For the diabetic children, data on their medical condition was also retrieved from their medical charts.

### Saliva samples and microbiological analyses

All subjects were instructed not to brush their teeth or to eat/drink during one hour prior to the oral examination.

Saliva sample was collected using paraffin gum during 5 min with continuously spitting into a test tube after 60 sec of pre-stimulation chewing one piece of paraffin [37]. Younger children were instructed on the collection procedure and followed during the test, inviting them repeatedly to spit during the 5 minutes of chewing. The saliva samples were sent to Department of Microbiology, University of Bologna for evaluation of oral microflora.

The microbiological analysis was made using the checkerboard DNA-DNA hybridisation method [38]. Whole genomic probes were matched from 15 bacterial strains (*Streptococcus mutans*, *Streptococcus sobrinus*, *Streptococcus criceti*, *Streptococcus downei*, *Streptococcus ferus*, *Streptococcus macacae*, *Streptococcus ratti*, *Streptococcus infantis*, *Streptococcus mitis*, *Streptococcus gordonii*, *Lactobacillus salivarius*, *Streptococcus sanguinis*, *Streptococcus salivarius*, *Lactobacillus casei*, *Lactobacillus fermentum*) known to be associated with caries. Matching the obtained signals with the ones generated by the pooled standard samples, containing a count of  $10^6$  and  $10^5$  of each bacterial species, respectively, an evaluation of the bacterial count was performed in the samples.

## Plaque acidogenicity

Immediately after the saliva sampling, the plaque acidogenicity was assessed using the pH indicator strips in the interproximal space in 2 sites: 1) between the first and the second maxillary primary molars right and left in the younger children or 2) between the 2<sup>nd</sup> primary molar and 1st maxillary molar right and left in the older children. The strips measure a pH value in the range of 4.0–7.0 (Spezialindikator, pH range 4.0–7.0; Merck, Darmstadt, Germany) [39]. Each strip was cut into 4 pieces (approx. 2 mm in width) to get a strip that more easily could be inserted into the interproximal space. The strip was held *in situ* for 10 s after which it was removed and its colour compared to the colour index scheme supplied by the manufacturer. The pH was determined to one decimal of the value. For each site, 3 measurements were carried out. Measurements were performed before (0 min) and at 2, 5, 10, 15, 20 and 30 min after a mouth rinse with 10% sucrose for 1-min.

## Statistical analyses

All the data were input into a spreadsheet (Microsoft Excel® 2011 for Mac, version 14.4.3). Statistical analyses were performed using Stata/SE® software, version 13.1 for Mac (64-bit Intel®).

Regarding questionnaire items, subjects were asked to choose from seven options ranging from never (zero intake) to more than four times per day and a score was given to each option (*i.e.* never or zero intake = 0, once a week = 1 etc.). The scores were then added for each participant as sugared beverage intake total score and sugared snack intake total score.

Data from the dental clinical examinations were grouped as follows: healthy/caries-free (ICDAS 0), initial (caries in enamel ICDAS 1–2), moderate (caries not cavitated ICDAS 3–4), and severe (cavitated caries in dentin ICDAS 5–6).

Data from microbiological analysis was coded on a scale from 0 to 5: 0 = no signal; 1 = a signal density weaker than that of the low standard ( $<10^5$  bacteria); 2 = a signal density equal to that of the low standard (=  $10^5$  bacteria); 3 = a signal density higher than that of the low standard but lower than that of the high standard ( $>10^5$  but  $<10^6$  bacteria); 4 = a signal density equal to that of the high standard (=  $10^6$  bacteria) and 5 = a signal density higher than that of the high standard ( $>10^6$  bacteria).

The mean plaque pH ( $\pm$  Standard Error) for all subjects at the different time points was calculated for the two interproximal sites. The maximum pH fall and minimum pH after the sucrose rinse were calculated for each subject. The pH curve, as the area below the critical pH of enamel ( $AUC_{5,7}$ ) and of dentine ( $AUC_{6,2}$ ) was also calculated [40].

Comparisons of the different variables were made between the diabetic and non-diabetic subjects and between diabetic subjects in good metabolic control and in bad metabolic control. All data was analysed univariately to describe the variables and distributions. Student t test between the two groups was calculated, and  $p < 0.05$  was considered as a significant level. To

avoid the attenuating effect of unequal variability among groups on the value of t, a square root transformation was performed when the response variable was a count. One-way analysis of variance (ANOVA) was performed for means comparison between diabetic subjects in good metabolic control, in bad metabolic control, and non-diabetic subjects. Moreover, a two-way table analysis (chi-square) was conducted to determine the association between diabetic and non-diabetic subjects and frequency of outcomes from the questionnaire items. If a cell contained a value less than five the Fisher's exact test was calculated.

## Result

Gender distribution was 33 males and 35 females in the diabetic group and exactly the double in the non-diabetic group; the mean age of the sample was similar in both groups (12.11+2.77 in diabetic group and 12.09+2.68 in non-diabetic group).

### Diet and oral hygiene habits

Sugared beverage and snack scores were significantly statistically higher in diabetic group compared to non-diabetic group ( $p = 0.03$  and  $p = 0.04$ , respectively); the scores were even higher in diabetic subjects in bad metabolic control respect to those in good metabolic control ( $p < 0.01$  for sugared beverage and  $p = 0.03$  for snacks) (Table 1).

The replies to the oral hygiene items (Table 2) were similar between diabetic and non-diabetic subjects, except for fluoridated adjuvants ( $p = 0.04$ ). The comparison between diabetic in good and bad metabolic control was statistically significant for the use of fluoridated toothpaste and frequency of toothbrushing for more than 2 minutes ( $p = 0.03$ ); moreover, the use of fluoridated toothpaste was also statistically significant different between diabetic subjects in bad metabolic control and non-diabetic subjects ( $p < 0.01$ ).

### Caries data

Caries free varies from 54% in diabetic subjects in bad metabolic control to 70% in diabetic subjects in good metabolic control (Fig 1). Overall no statistically significant differences were observed between diabetic and non-diabetic groups regarding caries prevalence, while the caries free subjects were statistically significant higher in diabetic group in good metabolic control compared to diabetic group in bad metabolic control ( $p < 0.01$ ). The others caries figures (Initial, Moderate and Extensive) were similar in all groups.

**Table 1. Sugared snacks and beverages intake in diabetic and non-diabetic children.** The replies were treated as continuous ordinal variables.

| Sugared snacks and beverages intake | Diabetic       |                |               | Non-diabetic   | Comparison            |                |                       |          |
|-------------------------------------|----------------|----------------|---------------|----------------|-----------------------|----------------|-----------------------|----------|
|                                     | <i>mean±SD</i> |                |               | <i>mean±SD</i> | <i>P value</i>        |                |                       |          |
|                                     | total          | good metabolic | bad metabolic |                | non-diabetic group vs |                |                       | diabetic |
|                                     |                |                |               | diabetic total | bad metabolic         | good metabolic | good metabolic vs bad |          |
|                                     | N = 68         | N = 20         | N = 48        | N = 136        |                       |                |                       |          |
| Sugared beverages                   | 4.10 ±2.66     | 2.83±1.22      | 5.23±2.81     | 2.47±1.24      | 0.03                  | <0.01          | <0.01                 | <0.01    |
| Sugared snacks                      | 4.43 ±2.61     | 2.00±1.90      | 5.68±2.65     | 2.16±1.35      | 0.04                  | 0.03           | 0.03                  | 0.03     |

<https://doi.org/10.1371/journal.pone.0188451.t001>

**Table 2. Oral hygiene habits and frequency of dental attendance in the examined groups.** The association between diabetics and non-diabetics and frequency of outcomes from the items was determined with chi-square test.

| Behavioural variables                  | Diabetic  |                |               | Non-diabetic | Comparison            |               |                |                       |
|----------------------------------------|-----------|----------------|---------------|--------------|-----------------------|---------------|----------------|-----------------------|
|                                        |           | mean±SD        |               | mean±SD      | P value               |               |                |                       |
|                                        | total     | good metabolic | bad metabolic |              | non-diabetic group vs |               |                | diabetic              |
|                                        |           |                |               |              | Diabetic total        | bad metabolic | good metabolic | good metabolic vs bad |
| <b>Fluoridated toothpaste</b>          |           |                |               |              |                       |               |                |                       |
| No                                     | 21 (38.9) | 10 (50.0)      | 11 (22.9)     | 61 (44.8)    | 0.36                  | <0.01         | 0.72           | 0.03                  |
| Yes                                    | 47 (69.1) | 10 (50.0)      | 37 (77.1)     | 75 (55.2)    |                       |               |                |                       |
| <b>Other fluoridated adjuvants</b>     |           |                |               |              |                       |               |                |                       |
| Yes                                    | 8 (11.8)  | 3 (15.0)       | 5 (10.4)      | 15 (11.0)    | 0.04                  | 0.69          | 0.72           | 0.83                  |
| Sometimes                              | 12 (27.6) | 6 (30.0)       | 6 (12.5)      | 32 (23.5)    |                       |               |                |                       |
| No                                     | 48 (70.6) | 11 (55.0)      | 37 (77.1)     | 89 (65.5)    |                       |               |                |                       |
| <b>Toothbrushing twice/day ≥ 2 min</b> |           |                |               |              |                       |               |                |                       |
| No                                     | 49 (72.1) | 13 (65.0)      | 36 (75.0)     | 98 (72.1)    | 0.93                  | 0.84          | 0.02           | 0.03                  |
| Sometimes                              | 11 (16.2) | 2 (10.0)       | 9 (18.7)      | 27 (19.8)    |                       |               |                |                       |
| Mostly every day                       | 8 (11.7)  | 5 (25.0)       | 3 (6.3)       | 11 (8.1)     |                       |               |                |                       |
| Every day                              | ---       | ---            | ---           | ---          |                       |               |                |                       |
| <b>Dental attendance</b>               |           |                |               |              |                       |               |                |                       |
| In pain                                | 15 (22.1) | 2 (10.0)       | 13 (27.1)     | 33 (24.3)    | 0.74                  | 0.58          | 0.08           | 0.12                  |
| Every six months                       | 18 (26.5) | 4 (20.0)       | 14 (29.2)     | 39 (28.6)    |                       |               |                |                       |
| Once a year                            | 35 (51.4) | 14 (70.0)      | 21 (43.7)     | 64 (47.1)    |                       |               |                |                       |

<https://doi.org/10.1371/journal.pone.0188451.t002>

### Microbiological analyses

No difficulties were found in the saliva collection even for the younger children since the sample procedure was proposed as a game. The association between bacteria strains and diabetic and non-diabetic subjects is displayed in Table 3. The bacteria strains were categorized in primary cariogenic bacteria (*S. mutans*, *S. sobrinus*, others mutans streptococci, *L. casei*, *L. fermentum*) and not primary cariogenic bacteria (*S. sanguinis*, *S. salivarius*, *S. mitis*, *S. gordonii*, *L. salivarius*).

A significant association for all primary cariogenic bacteria except for *L. casei* and others mutans streptococci was found in the comparison between diabetic and non-diabetic subjects ( $p < 0.05$ ). Statistically significant differences were recorded between diabetic subjects in good and bad metabolic control regarding several cariogenic bacteria ( $p < 0.05$ ). Not primary cariogenic strains, showed not statistically significant differences in the two groups. Only *S. salivarius* showed statistically significant differences in the comparison respectively between diabetic and non-diabetic subjects ( $p = 0.03$ ), between subjects in bad metabolic control and non-diabetic children ( $p < 0.01$ ) and between diabetic subjects in good and bad metabolic control ( $p = 0.04$ ).

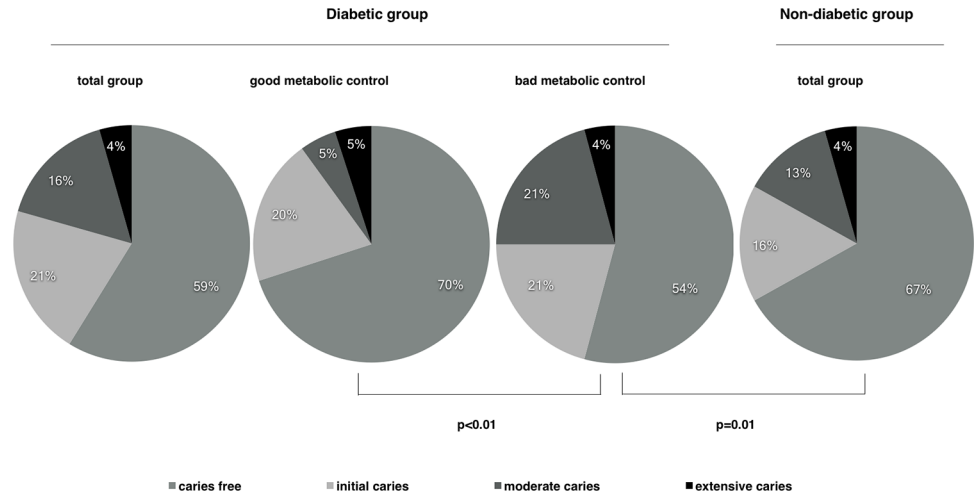

**Fig 1. Caries figures in diabetic (good and bad metabolic control) and non-diabetic groups.**

<https://doi.org/10.1371/journal.pone.0188451.g001>

### Plaque pH measurements

The pH values (Fig 2) showed statistically significant differences for  $AUC_{6.2}$  and  $AUC_{5.7}$  between diabetic and non-diabetic subjects, between diabetic subjects in good metabolic control and bad metabolic control and between diabetic in bad metabolic control and non-

**Table 3. Numbers of salivary bacteria in paraffin-stimulated saliva based on analysis of a 5-unit score (1 =  $<10^5$ , 2 =  $10^5$ , 3 =  $10^5 > x < 10^6$ , 4 =  $10^6$ , 5 =  $>10^6$ ).**

| Bacterial strains                      | Diabetic mean±SD |                |               | Non-diabetic mean±SD | Comparison P value    |                 |                |                       |
|----------------------------------------|------------------|----------------|---------------|----------------------|-----------------------|-----------------|----------------|-----------------------|
|                                        | total            | good metabolic | bad metabolic |                      | non-diabetic group vs |                 |                | diabetic              |
|                                        |                  |                |               |                      | diabetic total        | bad metabolic   | good metabolic | good metabolic vs bad |
| <b>Primary cariogenic bacteria</b>     |                  |                |               |                      |                       |                 |                |                       |
| <i>S. mutans</i>                       | 3.38 ±1.15       | 3.35±1.19      | 3.35±1.15     | 2.83±1.07            | <b>0.04</b>           | <b>0.03</b>     | <b>0.04</b>    | <b>0.03</b>           |
| <i>S. sobrinus</i>                     | 1.88 ±0.70       | 1.70±0.47      | 1.96±0.77     | 1.27±0.96            | <b>0.02</b>           | <b>&lt;0.01</b> | 0.34           | <b>0.04</b>           |
| others mutans streptococci             | 2.37 ±1.12       | 2.35±1.09      | 2.37±1.14     | 2.38±1.19            | 0.12                  | 0.21            | 0.51           | 0.63                  |
| <i>L. casei</i>                        | 2.03 ±0.90       | 1.85±0.67      | 2.10±0.97     | 1.98±1.03            | 0.96                  | <b>0.02</b>     | 0.57           | <b>0.04</b>           |
| <i>L. fermentum</i>                    | 2.48 ±0.97       | 2.25±0.85      | 2.58±1.01     | 2.15±1.21            | <b>0.03</b>           | <b>&lt;0.01</b> | 0.07           | <b>0.03</b>           |
| <b>Not primary cariogenic bacteria</b> |                  |                |               |                      |                       |                 |                |                       |
| <i>S. sanguinis</i>                    | 2.70 ±1.01       | 2.70±1.08      | 2.71±0.99     | 2.69±1.01            | 0.62                  | 0.81            | 0.96           | 0.51                  |
| <i>S. salivarius</i>                   | 2.81 ±1.07       | 2.60±0.94      | 2.89±1.11     | 2.46±0.95            | <b>0.03</b>           | <b>&lt;0.01</b> | 0.07           | <b>0.04</b>           |
| <i>S. mitis</i>                        | 2.46 ±1.01       | 2.35±1.04      | 2.54±1.01     | 2.22±1.04            | 0.90                  | 0.95            | 0.68           | 0.94                  |
| <i>S. gordonii</i>                     | 2.23 ±0.98       | 2.10±0.85      | 2.29±1.03     | 2.21±0.87            | 0.68                  | 0.62            | 0.48           | 0.50                  |
| <i>L. salivarius</i>                   | 2.48 ±0.95       | 2.45±1.10      | 2.50±0.90     | 2.27±1.15            | <b>0.03</b>           | <b>0.02</b>     | 0.86           | 0.92                  |

<https://doi.org/10.1371/journal.pone.0188451.t003>

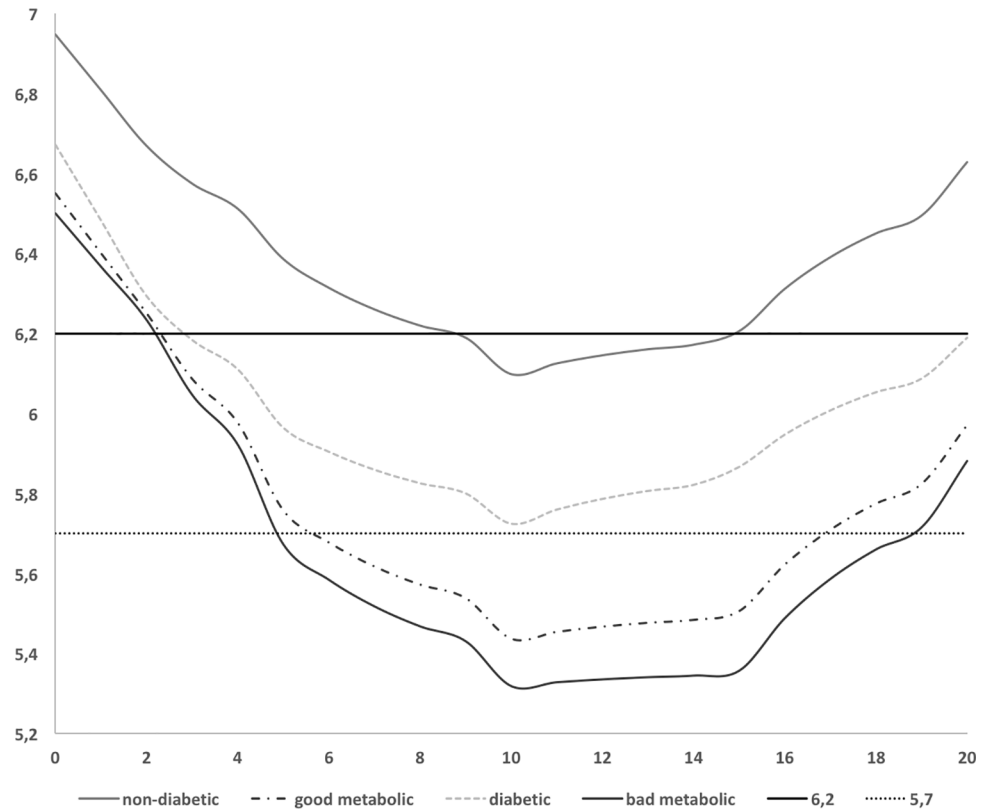

**Fig 2. The pH curves at AUC6.2 and AUC5.7 in diabetic (good and bad metabolic control) and non-diabetic groups.**

<https://doi.org/10.1371/journal.pone.0188451.g002>

diabetic subjects ( $p < 0.01$ ). The comparison between diabetic subjects in good metabolic control and non-diabetic subjects was statistically significant different ( $p < 0.01$ ) for all pH values except for maximum pH fall (*data not tables*).

## Discussion

The present study was carried out in order to evaluate the caries figure and the different caries-related variables between Type 1 diabetic and non-diabetic children and among diabetic children according to their metabolic status.

The main outcome was that the oral environment in diabetic population was more prone to caries compared to non-diabetic population even if the caries figures were not statistically significant different, data consistent with the results of previous studies [41]. As in non-diabetic population, in diabetic group a skewed caries distribution was evident. On the other hand, several authors [11, 42] reported a lower prevalence of caries in diabetic group than in non-diabetic population. In this study, a statistically significant higher caries figures were observed in diabetic subjects in bad metabolic control compare to those in good metabolic control. This finding might be linked to several factors like as a higher sugared snack and beverage intake, a non-optimal fluoride exposure, a more cariogenic microbial flora and lower plaque pH values.

A higher intake of sugared snacks and beverages was recorded in the diabetic children compared to non-diabetic; this difference was indeed mostly related to diabetic group in bad metabolic control, since diabetic subjects in good metabolic control reported a sugared foods intake even lower than non-diabetic subjects. International clinical guidelines on the management of



Type 1 diabetes call for a healthy diet [43]. The glycemic control may be improved by increasing the intake of foods with low glycemic index [44]. Low carbohydrate (30%-40% energy rate) and very low carbohydrate diets (21–70 g/d) are recommended for the management of Type 1 and Type 2 diabetes, respectively in order to control glycemic values [45]. The higher intake of sugared foods recorded in a sub-group of diabetic children might be considered a risk factor related to the bad glycemic control and the higher caries figures recorded.

Although the regular use of fluoride toothpaste is considered a cornerstone in dental health, producing the dramatic decline of the caries prevalence during the last decades of the 20th century in western countries [46], it might be not sufficient to prevent caries lesions in high risk subjects. In this study, no statistically significant differences were recorded about the use of fluoride toothpaste between diabetic and non-diabetic children; nevertheless considering others fluoridated adjuvants *i.e.* fluoride mouthrinse and tablets, a statistically significant difference was found, since diabetic children reported a less frequent use of fluoridated preventive products, contributing to explain the worse clinical situation. In addition, although all children declared to brush their teeth twice a day, the reported duration of the brushing considered effective for a good dental hygiene ( $\geq 2$  minutes) was statistically significant higher in diabetic group in good metabolic control compared to diabetic in bad metabolic control and non-diabetic group. This finding might also contribute to explain the caries figure in the studied populations [47].

Modern concepts regard caries as an interaction among biological, social, behavioural and psychological factors with the dental biofilm as the key element [16]. If a diet rich in fermentable carbohydrates is maintained, prolonged acidic conditions on the tooth surface become frequent and more aciduric bacteria become dominant through acid-induced selection [48]. Early acquisition of mutans streptococci is considered one of the key elements in the development of Early Childhood Caries and a predictable factor of future caries. Another important caries-associated microorganism is *Lactobacillus* species, which colonised carious lesions later than mutans streptococci [49]. Otherwise, the presence in the dental biofilm of some bacterial species as *S. sanguinis*, *S. salivarius*, *S. mitis* and others *Streptococcus spp.* as well as *Lactobacillus spp.* may moderate caries lesion development in children [50]. In the present study different strains of *Streptococcus* and *Lactobacillus spp.* were investigated. Regarding cariogenic bacteria the findings show a higher prevalence of caries-associated pathogens (*S. mutans* and *S. sobrinus*) in diabetic children compared to non-diabetic children and this difference increased when diabetic children in bad metabolic control were compared to non-diabetic children. In a recent paper, accordingly to our results, mutans streptococci were considered a significant variable affecting caries experience in diabetic children [19]. No differences in the distribution or number of mutans streptococci between Type 1 diabetic and non-diabetic children were also recorded [51]. In the same study significantly lower levels of lactobacilli were found among the diabetic children. This finding is in agreement with our results since *L. casei* and *L. fermentum* showed statistically significant lower concentrations in diabetic than in non-diabetic children. This finding is probably related to the higher intake of sugared beverages and snacks reported by diabetic children in bad metabolic control.

Stephan-curve was also recorded after a sugar challenge and minimum pH, maximum pH fall, and  $AUC_{6,2}$  and  $AUC_{5,7}$  were evaluated. Since they were firstly described, pH parameters have been frequently used for the evaluation of food cariogenicity and/or individual caries risk status [52]. Findings showed a more acidogenic environment in diabetic subjects compared to non-diabetic group. Differences were also recorded between diabetic children in bad and good metabolic control: all pH parameters were more prone to caries risk in children in bad metabolic control than in good.

Despite the study limitations, primarily the subjects sampled from a limited geographical area, a longitudinal clinical evaluation of the study participants might lead to an increase of information on the oral health status of the diabetic young patients.

Both diabetes and caries are complex multifactorial diseases. These results underline that, even if it is difficult to separate specific effects of diabetes-induced changes on the caries process, caries and diabetes recognize diet as a main risk factor in the disease management.

Based on this study's results, the following conclusions can be summarized:

Diabetic subjects in good metabolic control might even be considered at low caries risk, since they show an oral environment less prone to caries risk compared to non-diabetic population.

Otherwise, diabetic subjects in bad metabolic control showed a worse oral environment and are at high risk of caries.

## Acknowledgments

The authors would like to thank the staff of the paediatric diabetic clinic of the University of Sassari for the help provided. No funding was provided for this study.

## Author Contributions

**Conceptualization:** Stefano Lai, Gianfranco Meloni, Guglielmo Campus, Peter Lingström.

**Data curation:** Fabio Cocco, Dina Cossellu.

**Formal analysis:** Fabio Cocco.

**Investigation:** Stefano Lai.

**Methodology:** Guglielmo Campus.

**Supervision:** Gianfranco Meloni, Guglielmo Campus.

**Validation:** Maria Grazia Cagetti, Fabio Cocco.

**Writing – original draft:** Stefano Lai, Maria Grazia Cagetti, Gianfranco Meloni, Peter Lingström.

**Writing – review & editing:** Maria Grazia Cagetti, Fabio Cocco, Guglielmo Campus, Peter Lingström.

## References

1. American Diabetes A. Diagnosis and classification of diabetes mellitus. *Diabetes Care*. 2014; 37 Suppl 1:S81–90. <https://doi.org/10.2337/dc14-S081> PMID: 24357215
2. Group DP. Incidence and trends of childhood Type 1 diabetes worldwide 1990–1999. *Diabet Med*. 2006; 23(8):857–66. <https://doi.org/10.1111/j.1464-5491.2006.01925.x> PMID: 16911623
3. American Diabetes A. Diagnosis and classification of diabetes mellitus. *Diabetes Care*. 2013; 36 Suppl 1:S67–74. <https://doi.org/10.2337/dc13-S067> PMID: 23264425
4. Committee of the Japan Diabetes Society on the Diagnostic Criteria of Diabetes M, Seino Y, Nanjo K, Tajima N, Kadowaki T, Kashiwagi A, et al. Report of the committee on the classification and diagnostic criteria of diabetes mellitus. *J Diabetes Investig*. 2010; 1(5):212–28. <https://doi.org/10.1111/j.2040-1124.2010.00074.x> PMID: 24843435
5. Variation and trends in incidence of childhood diabetes in Europe. EURODIAB ACE Study Group. *Lancet*. 2000; 355(9207):873–6. PMID: 10752702
6. Vehik K, Hamman RF, Lezotte D, Norris JM, Klingensmith G, Bloch C, et al. Increasing incidence of type 1 diabetes in 0- to 17-year-old Colorado youth. *Diabetes Care*. 2007; 30(3):503–9. <https://doi.org/10.2337/dc06-1837> PMID: 17327312

7. International Society for Pediatric and Adolescent Diabetes (ISPAD) Clinical Practice Consensus Guidelines 2014. Nutritional management in children and adolescents with diabetes. *Pediatr Diabetes*. 2014; 15 Suppl 20:1–290.
8. Leite RS, Marlow NM, Fernandes JK. Oral health and type 2 diabetes. *The American journal of the medical sciences*. 2013; 345(4):271–3. <https://doi.org/10.1097/MAJ.0b013e31828bdeedf> PMID: 23531957
9. Aitken-Saavedra J, Rojas-Alcayaga G, Maturana-Ramirez A, Escobar-Alvarez A, Cortes-Coloma A, Reyes-Rojas M, et al. Salivary gland dysfunction markers in type 2 diabetes mellitus patients. *Journal of clinical and experimental dentistry*. 2015; 7(4):e501–5. <https://doi.org/10.4317/jced.52329> PMID: 26535097
10. K MP, Johnson P, Ganesh M, Subhashini AS. Evaluation of Salivary Profile among Adult Type 2 Diabetes Mellitus Patients in South India. *Journal of clinical and diagnostic research: JCDR*. 2013; 7(8):1592–5. <https://doi.org/10.7860/JCDR/2013/5749.3232> PMID: 24086848
11. Siudikiene J, Machiulskiene V, Nyvad B, Tenovuo J, Nedzelskiene I. Dental caries increments and related factors in children with type 1 diabetes mellitus. *Caries Res*. 2008; 42(5):354–62. <https://doi.org/10.1159/000151582> PMID: 18728367
12. Rai K, Hegde AM, Kamath A, Shetty S. Dental caries and salivary alterations in Type I Diabetes. *The Journal of clinical pediatric dentistry*. 2011; 36(2):181–4. PMID: 22524081
13. Miralles L, Silvestre FJ, Hernandez-Mijares A, Bautista D, Llambes F, Grau D. Dental caries in type 1 diabetics: influence of systemic factors of the disease upon the development of dental caries. *Medicina oral, patologia oral y cirugia bucal*. 2006; 11(3):E256–60. PMID: 16648764
14. Tanzer JM, Livingston J, Thompson AM. The microbiology of primary dental caries in humans. *Journal of dental education*. 2001; 65(10):1028–37. PMID: 11699974
15. Innes NP, Frencken JE, Bjorndal L, Maltz M, Manton DJ, Ricketts D, et al. Managing Carious Lesions: Consensus Recommendations on Terminology. *Advances in dental research*. 2016; 28(2):49–57. <https://doi.org/10.1177/0022034516639276> PMID: 27099357
16. Selwitz RH, Ismail AI, Pitts NB. Dental caries. *Lancet (London, England)*. 2007; 369(9555):51–9. [https://doi.org/10.1016/s0140-6736\(07\)60031-2](https://doi.org/10.1016/s0140-6736(07)60031-2)
17. Negrato CA, Tarzia O. Buccal alterations in diabetes mellitus. *Diabetol Metab Syndr*. 2010; 2:3. <https://doi.org/10.1186/1758-5996-2-3> PMID: 20180965
18. Lopez ME, Colloca ME, Paez RG, Schallmach JN, Koss MA, Chervonagura A. Salivary characteristics of diabetic children. *Braz Dent J*. 2003; 14(1):26–31. PMID: 12656461
19. El-Tekeya M, El Tantawi M, Fetouh H, Mowafy E, Abo Khedr N. Caries risk indicators in children with type 1 diabetes mellitus in relation to metabolic control. *Pediatric dentistry*. 2012; 34(7):510–6. PMID: 23265173
20. Miko S, Ambrus SJ, Sahafian S, Dinya E, Tamas G, Albrecht MG. Dental caries and adolescents with type 1 diabetes. *Br Dent J*. 2010; 208(6):E12. <https://doi.org/10.1038/sj.bdj.2010.290> PMID: 20339402
21. Saes Busato IM, Bittencourt MS, Machado MAN, Gregio AMT, Azevedo-Alanis LR. Association between metabolic control and oral health in adolescents with type 1 diabetes mellitus. *Oral Surg Oral Med Oral Pathol Oral Radiol Endod*. 2010; 109(3):e51–6. <https://doi.org/10.1016/j.tripleo.2009.10.037> PMID: 20219586
22. Singh-Husgen P, Meissner T, Bizhang M, Henrich B, Raab WH. Investigation of the oral status and microorganisms in children with phenylketonuria and type 1 diabetes. *Clin Oral Investig*. 2015. <https://doi.org/10.1007/s00784-015-1564-7> PMID: 26297129
23. Tagelsir A, Cauwels R, van Aken S, Vanobbergen J, Martens LC. Dental caries and dental care level (restorative index) in children with diabetes mellitus type 1. *Int J Paediatr Dent*. 2011; 21(1):13–22. <https://doi.org/10.1111/j.1365-263X.2010.01094.x> PMID: 20731732
24. Singh-Husgen P, Meissner T, Bizhang M, Henrich B, Raab WH. Investigation of the oral status and microorganisms in children with phenylketonuria and type 1 diabetes. *Clin Oral Investig*. 2016; 20(4):841–7. <https://doi.org/10.1007/s00784-015-1564-7> PMID: 26297129
25. Akpata ES, Alomari Q, Mojiminiyi OA, Al-Sanae H. Caries experience among children with type 1 diabetes in Kuwait. *Pediatric dentistry*. 2012; 34(7):468–72. PMID: 23265163
26. Twetman S, Johansson I, Birkhed D, Nederfors T. Caries incidence in young type 1 diabetes mellitus patients in relation to metabolic control and caries-associated risk factors. *Caries Res*. 2002; 36(1):31–5. doi: 57587. <https://doi.org/10.1159/000057587> PMID: 11961327
27. Ismail AF, McGrath CP, Yiu CK. Oral health of children with type 1 diabetes mellitus: A systematic review. *Diabetes Res Clin Pract*. 2015; 108(3):369–81. <https://doi.org/10.1016/j.diabres.2015.03.003> PMID: 25817182
28. Il Registro del diabete tipo 1 in età pediatrica in Sardegna. Available from: [https://www.regione.sardegna.it/documenti/1\\_19\\_20120702174709.pdf](https://www.regione.sardegna.it/documenti/1_19_20120702174709.pdf).

29. Carta G, Cagetti MG, Sale S, Congiu G, Strohmer L, Oleari F, et al. Oral health inequalities in Italian schoolchildren—a cross-sectional evaluation. *Community dental health*. 2014; 31(2):123–8. PMID: [25055611](https://pubmed.ncbi.nlm.nih.gov/25055611/)
30. Chiang JL, Kirkman MS, Laffel LMB, Peters AL, Type 1 Diabetes Sourcebook A, Algothani N, et al. Type 1 diabetes through the life span: a position statement of the American Diabetes Association. *Diabetes care*. 2014; 37(7):2034–54. <https://doi.org/10.2337/dc14-1140> PMID: [24935775](https://pubmed.ncbi.nlm.nih.gov/24935775/)
31. Rewers MJ, Pillay K, de Beaufort C, Craig ME, Hanas R, Acerini CL, et al. ISPAD Clinical Practice Consensus Guidelines 2014. Assessment and monitoring of glycemic control in children and adolescents with diabetes. *Pediatr Diabetes*. 2014; 15 Suppl 20:102–14. <https://doi.org/10.1111/pedi.12190> PMID: [25182311](https://pubmed.ncbi.nlm.nih.gov/25182311/)
32. Neuhauser ML, Lilley S, Lund A, Johnson DB. Development and validation of a beverage and snack questionnaire for use in evaluation of school nutrition policies. *Journal of the American Dietetic Association*. 2009; 109(9):1587–92. <https://doi.org/10.1016/j.jada.2009.06.365> PMID: [19699839](https://pubmed.ncbi.nlm.nih.gov/19699839/)
33. Losasso C, Cappa V, Neuhauser ML, Giaccone V, Andrighetto I, Ricci A. Students' Consumption of Beverages and Snacks at School and Away from School: A Case Study in the North East of Italy. *Frontiers in nutrition*. 2015; 2:30. <https://doi.org/10.3389/fnut.2015.00030> PMID: [26501063](https://pubmed.ncbi.nlm.nih.gov/26501063/)
34. Nordstrom A, Birkhed D. Attitudes and behavioural factors relating to toothbrushing and the use of fluoride toothpaste among caries-active Swedish adolescents—a questionnaire study. *Acta odontologica Scandinavica*. 2017; 75(7):483–7. <https://doi.org/10.1080/00016357.2017.1344876> PMID: [28701058](https://pubmed.ncbi.nlm.nih.gov/28701058/)
35. Carlen A, Hassan H, Lingstrom P. The 'strip method': a simple method for plaque pH assessment. *Caries Res*. 2010; 44(4):341–4. <https://doi.org/10.1159/000315273> PMID: [20616550](https://pubmed.ncbi.nlm.nih.gov/20616550/)
36. Pitts NB, Ekstrand KR, Foundation I. International Caries Detection and Assessment System (ICDAS) and its International Caries Classification and Management System (ICCMS)—methods for staging of the caries process and enabling dentists to manage caries. *Community Dent Oral Epidemiol*. 2013; 41(1):e41–52. <https://doi.org/10.1111/cdoe.12025> PMID: [24916677](https://pubmed.ncbi.nlm.nih.gov/24916677/)
37. Jasim H, Olausson P, Hedenberg-Magnusson B, Ernberg M, Ghafouri B. The proteomic profile of whole and glandular saliva in healthy pain-free subjects. *Scientific reports*. 2016; 6:39073. <https://doi.org/10.1038/srep39073> PMID: [27976689](https://pubmed.ncbi.nlm.nih.gov/27976689/)
38. Wall-Manning GM, Sissons CH, Anderson SA, Lee M. Checkerboard DNA-DNA hybridisation technology focused on the analysis of Gram-positive cariogenic bacteria. *J Microbiol Methods*. 2002; 51(3):301–11. PMID: [12223290](https://pubmed.ncbi.nlm.nih.gov/12223290/)
39. Campus G, Cagetti MG, Cocco F, Sale S, Sacco G, Strohmer L, et al. Effect of a sugar-free chewing gum containing magnolia bark extract on different variables related to caries and gingivitis: a randomized controlled intervention trial. *Caries Res*. 2011; 45(4):393–9. <https://doi.org/10.1159/000330234> PMID: [21822018](https://pubmed.ncbi.nlm.nih.gov/21822018/)
40. Bonate PL. Coverage and precision of confidence intervals for area under the curve using parametric and non-parametric methods in a toxicokinetic experimental design. *Pharmaceutical research*. 1998; 15(3):405–10. PMID: [9563069](https://pubmed.ncbi.nlm.nih.gov/9563069/)
41. Karjalainen KM, Knuutila ML, Kaar ML. Relationship between caries and level of metabolic balance in children and adolescents with insulin-dependent diabetes mellitus. *Caries Res*. 1997; 31(1):13–8. PMID: [8955988](https://pubmed.ncbi.nlm.nih.gov/8955988/)
42. Orbak R, Simsek S, Orbak Z, Kavrut F, Colak M. The influence of type-1 diabetes mellitus on dentition and oral health in children and adolescents. *Yonsei medical journal*. 2008; 49(3):357–65. <https://doi.org/10.3349/ymj.2008.49.3.357> PMID: [18581583](https://pubmed.ncbi.nlm.nih.gov/18581583/)
43. Couper JJ, Haller MJ, Ziegler AG, Knip M, Ludvigsson J, Craig ME. ISPAD Clinical Practice Consensus Guidelines 2014. Phases of type 1 diabetes in children and adolescents. *Pediatr Diabetes*. 2014; 15 Suppl 20:18–25.
44. Nansel TR, Lipsky LM, Liu A. Greater diet quality is associated with more optimal glycemic control in a longitudinal study of youth with type 1 diabetes. *The American journal of clinical nutrition*. 2016; 104(1):81–7. <https://doi.org/10.3945/ajcn.115.126136> PMID: [27194309](https://pubmed.ncbi.nlm.nih.gov/27194309/)
45. Wheeler ML, Dunbar SA, Jaacks LM, Karmally W, Mayer-Davis EJ, Wylie-Rosett J, et al. Macronutrients, food groups, and eating patterns in the management of diabetes: a systematic review of the literature, 2010. *Diabetes Care*. 2012; 35(2):434–45. <https://doi.org/10.2337/dc11-2216> PMID: [22275443](https://pubmed.ncbi.nlm.nih.gov/22275443/)
46. Bratthall D, Hansel-Petersson G, Sundberg H. Reasons for the caries decline: what do the experts believe? *Eur J Oral Sci*. 1996; 104(4 (Pt 2)):416–22; discussion 23–5, 30–2.
47. Creeth JE, Kelly SA, Gonzalez-Cabezas C, Karwal R, Martinez-Mier EA, Lynch RJ, et al. Effect of toothbrushing duration and dentifrice quantity on enamel remineralisation: An in situ randomized clinical trial. *Journal of dentistry*. 2016; 55:61–7. <https://doi.org/10.1016/j.jdent.2016.10.003> PMID: [27717756](https://pubmed.ncbi.nlm.nih.gov/27717756/)

48. Takahashi N, Nyvad B. The role of bacteria in the caries process: ecological perspectives. *Journal of dental research*. 2011; 90(3):294–303. <https://doi.org/10.1177/0022034510379602> PMID: 20924061
49. Mitrakul K, Asvanund Y, Vongsavan K. Prevalence of five biofilm-related oral streptococci species from plaque. *The Journal of clinical pediatric dentistry*. 2011; 36(2):161–6. PMID: 22524078
50. Mitrakul K, Vongsavan K, Suratanachaiikul P. Prevalence of *Streptococcus mutans* and *Lactobacillus fermentum* and their association with caries and dietary habits in preschool Thai children. *European archives of paediatric dentistry: official journal of the European Academy of Paediatric Dentistry*. 2013; 14(2):83–7. <https://doi.org/10.1007/s40368-013-0017-8> PMID: 23576064
51. Twetman S, Aronsson S, Bjorkman S. Mutans streptococci and lactobacilli in saliva from children with insulin-dependent diabetes mellitus. *Oral microbiology and immunology*. 1989; 4(3):165–8. PMID: 2639301
52. Lingstrom P, Imfeld T, Birkhed D. Comparison of three different methods for measurement of plaque-pH in humans after consumption of soft bread and potato chips. *Journal of dental research*. 1993; 72(5):865–70. <https://doi.org/10.1177/00220345930720050601> PMID: 8501283
